# Supplementary material
Source: Royal Society of Chemistry journal article supplement (doi:10.1039/d6sm00048g)
Supplement: d6sm00048g1.pdf [file d6sm00048g1.pdf]

## Supporting Information

### Interfacial Ion Transport in Cellulose Nanocrystal-Based Ionogels with Low Ionic Liquid Content

Yang Ge<sup>‡</sup>, Kyle Shultz<sup>‡</sup>, Joyce Sundo, Benjamin Paren\* and Pinar Akcora\*

*Department of Chemical Engineering and Materials Science, Stevens Institute of Technology*

*Hoboken, NJ 07030, United States*

<sup>‡</sup> *These authors contributed equally as co-first authors.*

\* Email: pakcora@stevens.edu, bparen@stevens.edu

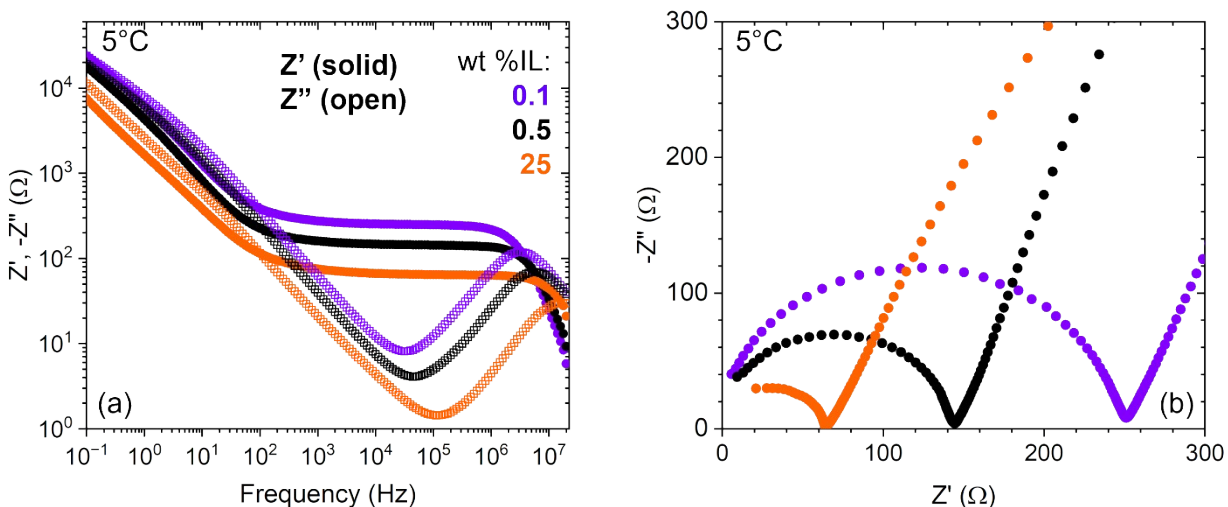

**Figure S1.** (a) Representative Bode Plot ( $Z'$  and  $-Z''$  vs. Frequency) for 0.1, 0.5, and 25 wt% IL systems at 5 °C and (b) corresponding Nyquist plots ( $-Z''$  vs.  $Z'$ ) of these same systems. These were selected to illustrate the presence of a frequency-independent plateau in (a), and equivalent circuit model behavior in (b) for the entire range of IL concentrations. Consistent with the equivalent circuit model, the resistance,  $R$  corresponds to the value of  $Z'$  when  $-Z''$  is at a minimum, as seen in both (a) and (b).

**Water-Mediated Stability of CNC-DMF mixture:**

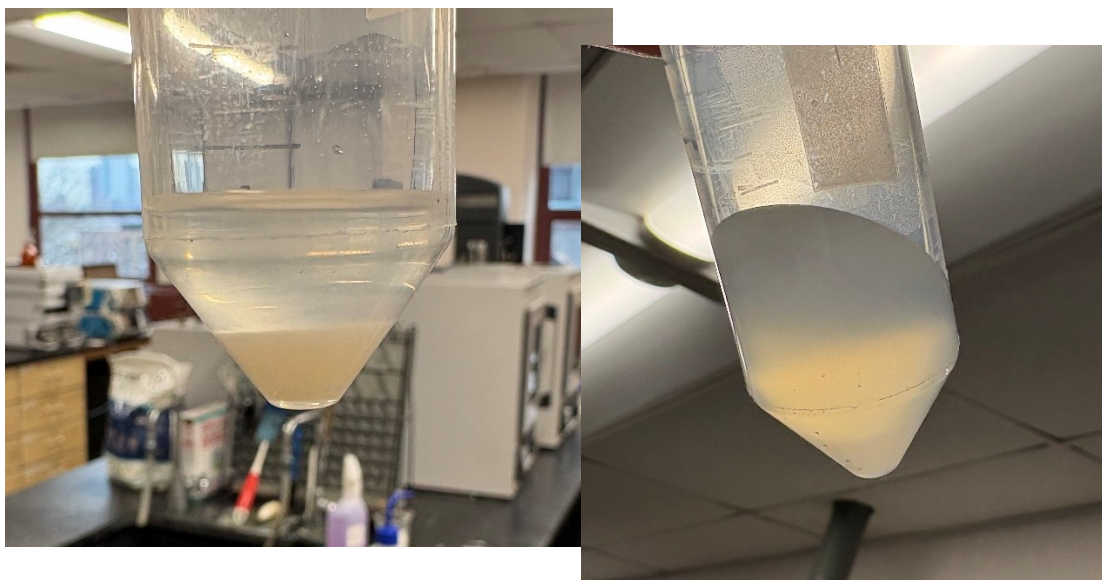

**Figure S2.** CNC-DMF mixture (left) and CNC-DMF-water mixture (right) after storing for 24 h.

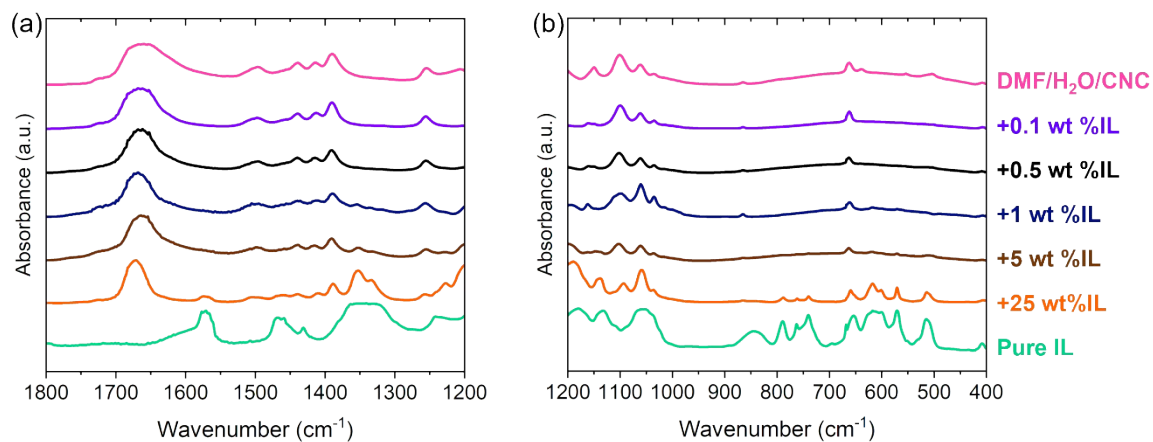

**Figure S3.** FTIR absorbance spectra for DMF-water-CNC-HMIm-TFSI systems at (a) 1800-1200  $\text{cm}^{-1}$  and (b) 1200-400  $\text{cm}^{-1}$ .

**Table S1.** Characteristic DMF band at  $\sim 1511\text{ cm}^{-1}$  for the N-CH<sub>3</sub> stretching vibration shifts toward lower wavenumbers with the increasing IL amount.

| Sample name                         | Peak wavenumber ( $\text{cm}^{-1}$ ) |
|-------------------------------------|--------------------------------------|
| DMF                                 | 1502                                 |
| DMF+CNC                             | 1501                                 |
| DMF+CNC+H <sub>2</sub> O            | 1496                                 |
| DMF+CNC+H <sub>2</sub> O+0.1 wt% IL | 1495                                 |
| DMF+CNC+H <sub>2</sub> O+0.5 wt% IL | 1496                                 |
| DMF+CNC+H <sub>2</sub> O+1 wt% IL   | 1497                                 |
| DMF+CNC+H <sub>2</sub> O+5 wt% IL   | 1497                                 |
| DMF+CNC+H <sub>2</sub> O+25 wt% IL  | 1505                                 |

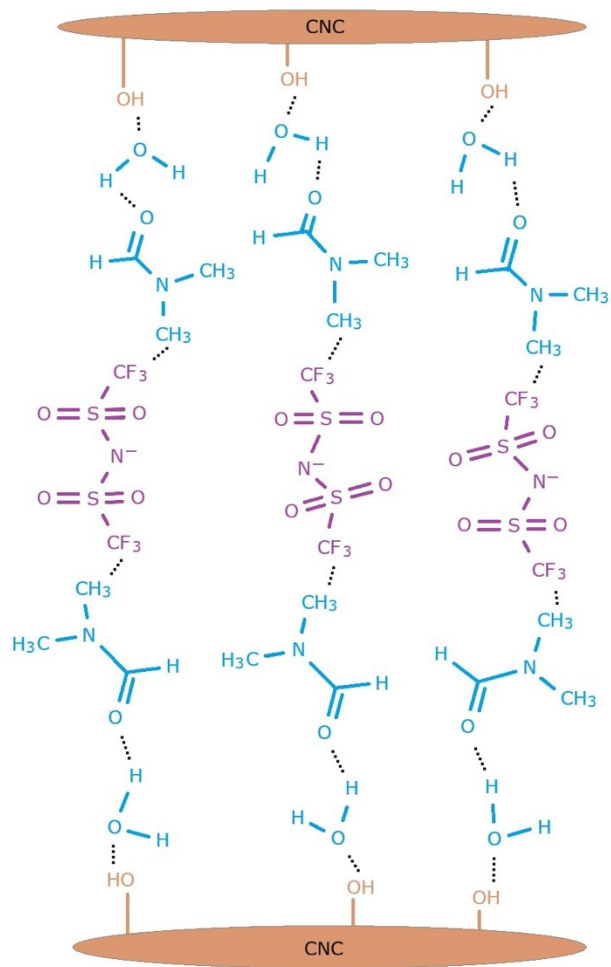

**Figure S4.** Schematic diagram of hydrogen bonds between water-DMF and ion-dipole interactions between HMIIm-TFSI-DMF.

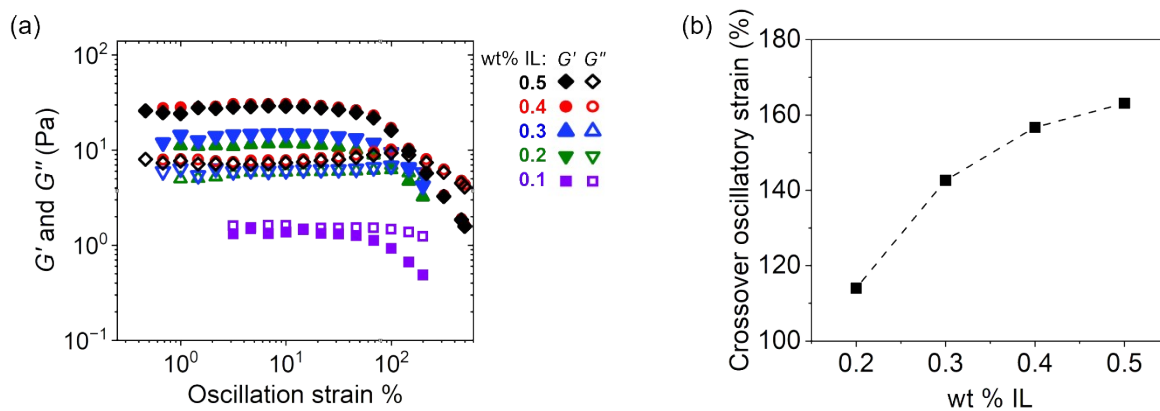

**Figure S5. (a)** Strain sweep data of CNC-HMIm-TFSI gels with DMF-water measured at room temperature at 1 rad/s frequency at 25°C,  $G'$  (closed symbols) and loss  $G''$  (open symbols). **(b)** Crossover strain increases with varying HMIm-TFSI wt %.

1wt% IL      5wt% IL      10wt% IL      25wt% IL

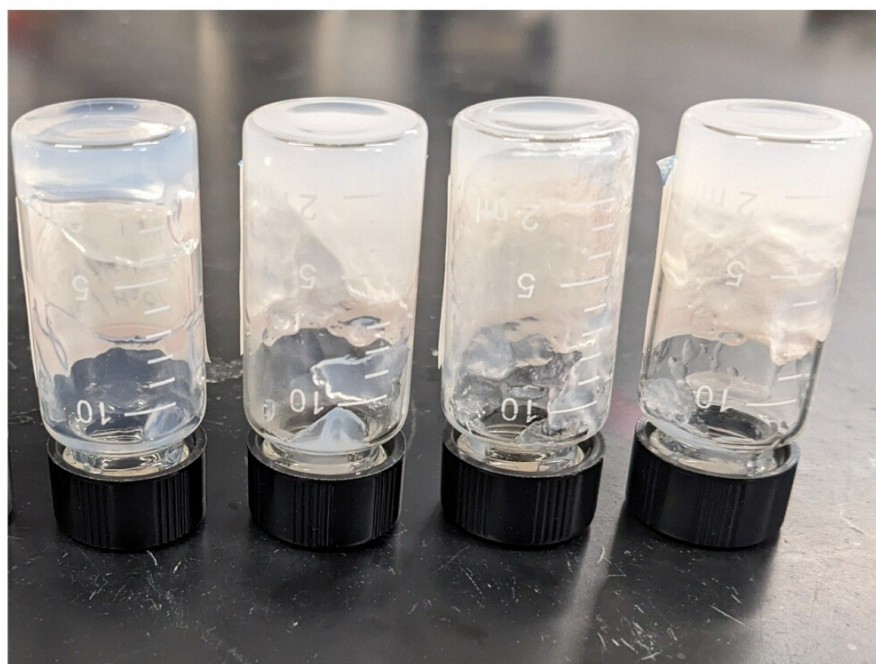

**Figure S6.** Photograph of CNC/IL gels with 1-25 wt% HMIm-TFSI amounts.

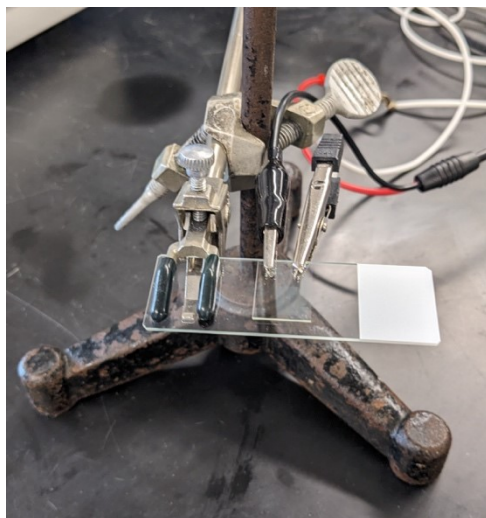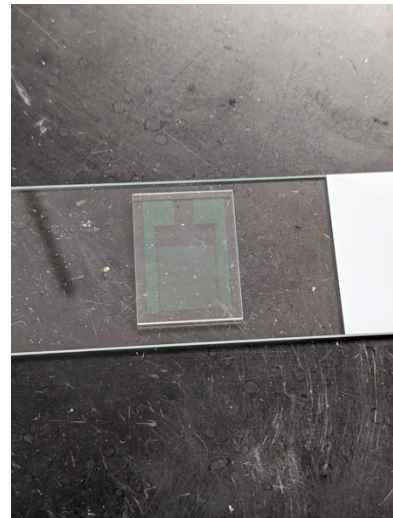

**Figure S7.** Photograph of an apparatus used to apply electric fields on sample droplets placed on an interdigitated electrode (on the right).

0 V

25 V

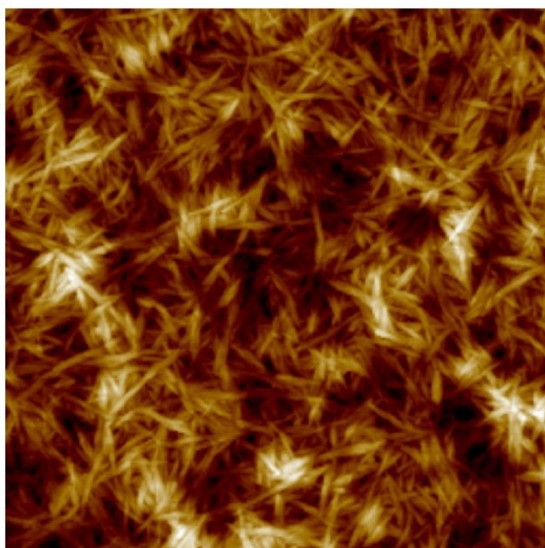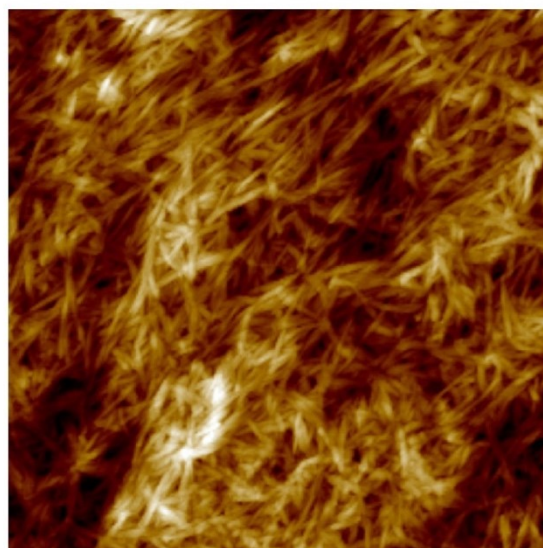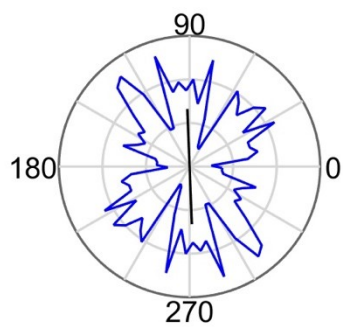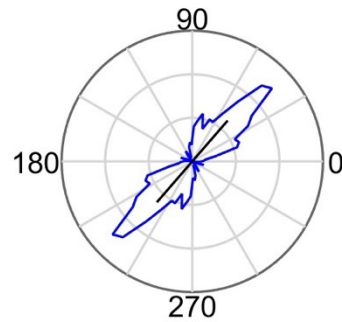

**Figure S8.** GTFiber analysis obtained from AFM topography of CNC gel with 0.1 wt% HMIIm-TFSI before (0 V) and after (25 V) electric field application. The orientation map across the selected area yields the nanocrystal orientation under applied fields.
